# Supplementary material for: Self-assembled platinum nanoparticles into heavily fluorinated templates: reactive gas effect on the morphology
Source: Royal Society of Chemistry journal article supplement (doi:10.1039/b822575c), 2009-01-01
Supplement: b822575c.pdf [file b822575c.pdf]

## Supporting Information

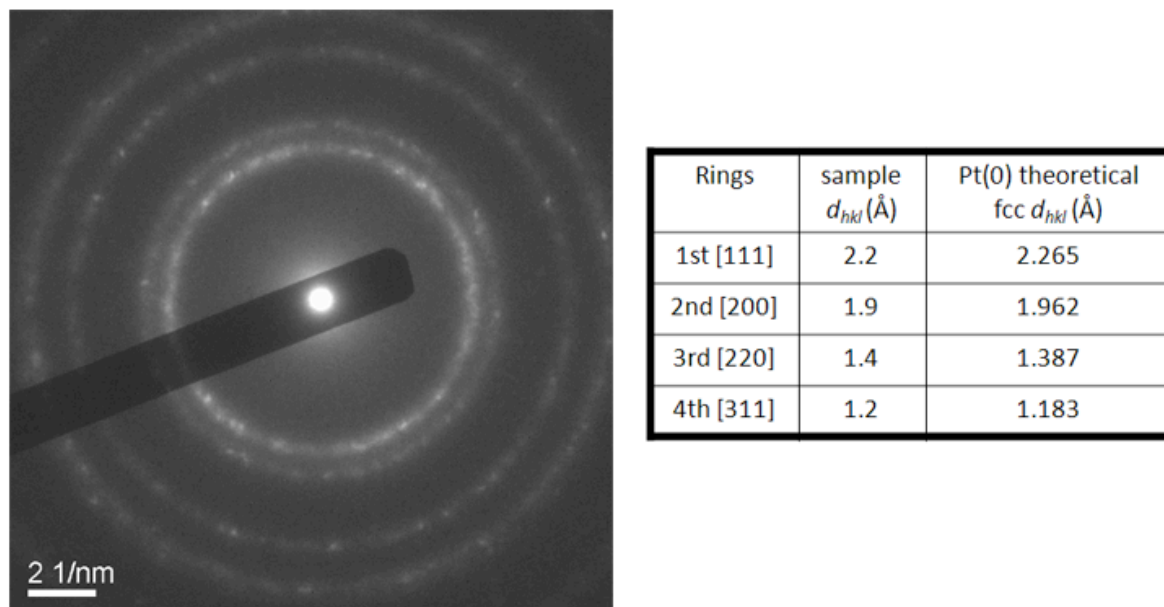

Figure S1. Electron diffraction performed on a HREM image of Pt superstructures obtained for the molar ratio  $L2/Pt = 2.8$  ( $Pt5[L2]H_2$ ).

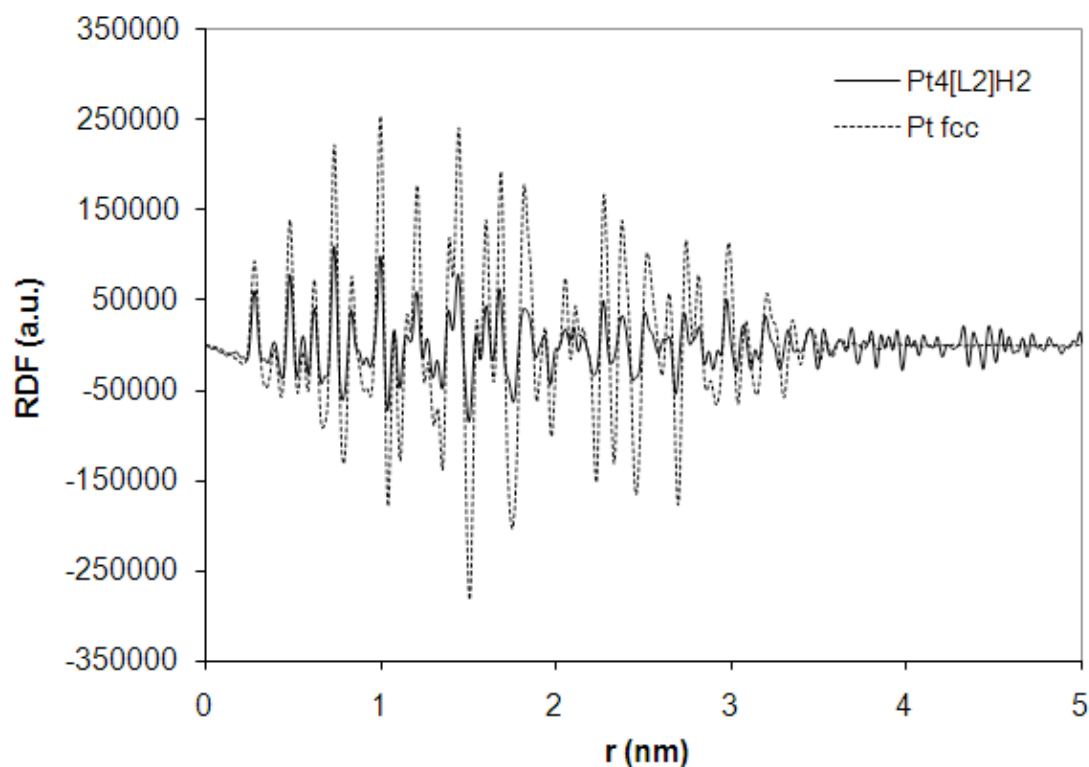

Figure S2. WAXS analysis carried out on Pt nanomaterial obtained for the molar ratio  $L2/Pt = 1.4$  ( $Pt4[L2]H_2$ ).
